# Supplementary material
Source: PubMed Central journal article supplement (PMC3801078)
Supplement: 1304366110_pnas.201304366SI.pdf [file 1304366110_pnas.201304366SI.pdf]

# Supporting Information

Cheent et al. 10.1073/pnas.1304366110

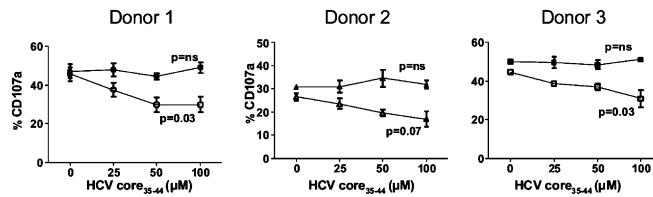

**Fig. S1.** Synergy of hepatitis C virus (HCV) core<sub>35–44</sub> peptides and HLA-A2 signal peptides (HLA-A2<sub>sp</sub>) in inhibiting NKG2<sup>+</sup> natural killer (NK) cells from three additional donors. Degranulation of CD3<sup>+</sup> CD56<sup>+</sup> NKG2<sup>+</sup> CD158b<sup>−</sup> NK cells in response to .174 cells incubated with 0–100 μM HCV core<sub>35–44</sub> alone (closed symbols), or in the presence of 1 μM HLA-A2<sub>sp</sub> (open symbols). Data are shown as means ± SEM from three independent experiments. *P* values were calculated using one-way ANOVA.

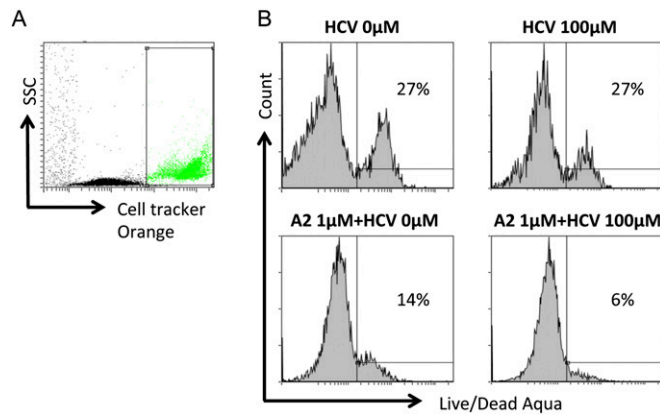

**Fig. S2.** Flow cytometry cytotoxicity assays using sorted NKG2<sup>+</sup> NK cells. .174 cells incubated with 0 or 100 μM HCV core<sub>35–44</sub> alone or in the presence of 1 μM HLA-A2<sub>sp</sub> were labeled with Cell Tracker Orange and then were used as targets in cytotoxicity assays with NKG2<sup>+</sup> NK cells. The gating strategy for the 0.174 target cells is shown in *A*, and the percentage of dead cells is indicated in *B*. SSC, side scatter.

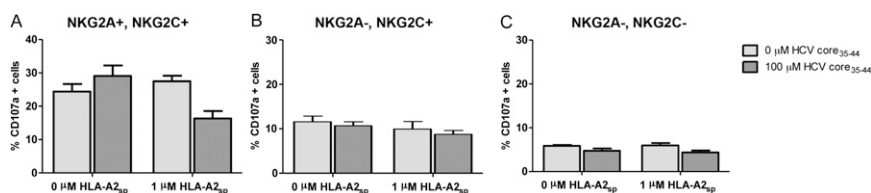

**Fig. S3.** Synergy of HCV core<sub>35–44</sub> and HLA-A2<sub>sp</sub> peptides in inhibiting specific subpopulations of NK cells. Degranulation of CD158b<sup>−</sup> NKG2A<sup>+</sup> NKG2C<sup>+</sup> (*A*), CD158b<sup>−</sup> NKG2A<sup>−</sup> NKG2C<sup>+</sup> (*B*), and CD158b<sup>−</sup> NKG2A<sup>−</sup> NKG2C<sup>−</sup> (*C*) NK cells in response to .174 cells incubated with 0 or 100 μM HCV core<sub>35–44</sub> alone or in the presence of 1 μM HLA-A2<sub>sp</sub>. Data are shown as means ± SEM from three independent experiments.

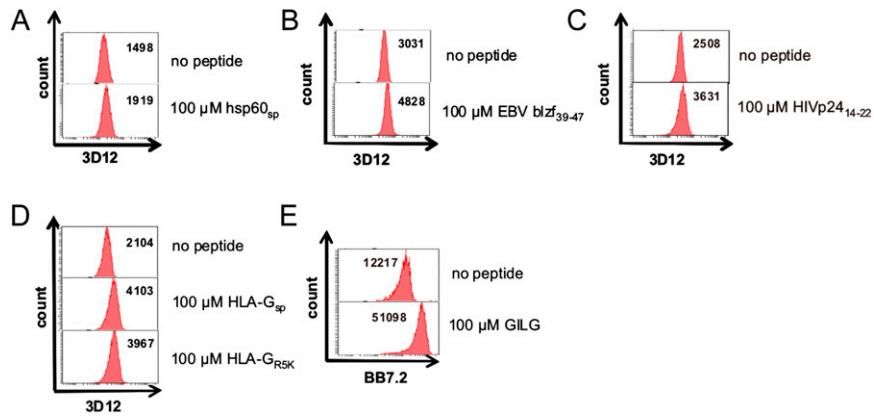

**Fig. S4.** Peptide stabilization assays. Stabilization of HLA-E on .174 cells in the absence of peptide or loaded with 100  $\mu$ M hsp60<sub>sp</sub> (A), EBV bzlf<sub>39-47</sub> (B), HIV p24<sub>14-22</sub> (C), or HLA-G<sub>sp</sub> and HLA-G<sub>R5K</sub> (D), as determined by flow cytometry. (E) Stabilization of HLA-A2 by GILGFVFTL (GILG) as measured by the HLA-A2-specific antibody BB7.2. For all histograms the mean fluorescence intensity of staining is shown within the relevant histogram plot.
